# Supplementary material
Source: PubMed Central journal article supplement (PMC3127530)
Supplement: supp_mol.111.071787_Supplemental_figure_8_revised.pdf [file supp_mol.111.071787_Supplemental_figure_8_revised.pdf]

Supplemental data

**Title:** In vivo and in vitro characterization of a first-in-class novel azole analog that targets PXR activation

**Authors:** Madhukumar Venkatesh, Hongwei Wang, Julie Cayer, Melissa Leroux, Dany Salvail, Bhaskar Das, Jay Wrobel, Sridhar Mani

**Journal:** Molecular Pharmacology

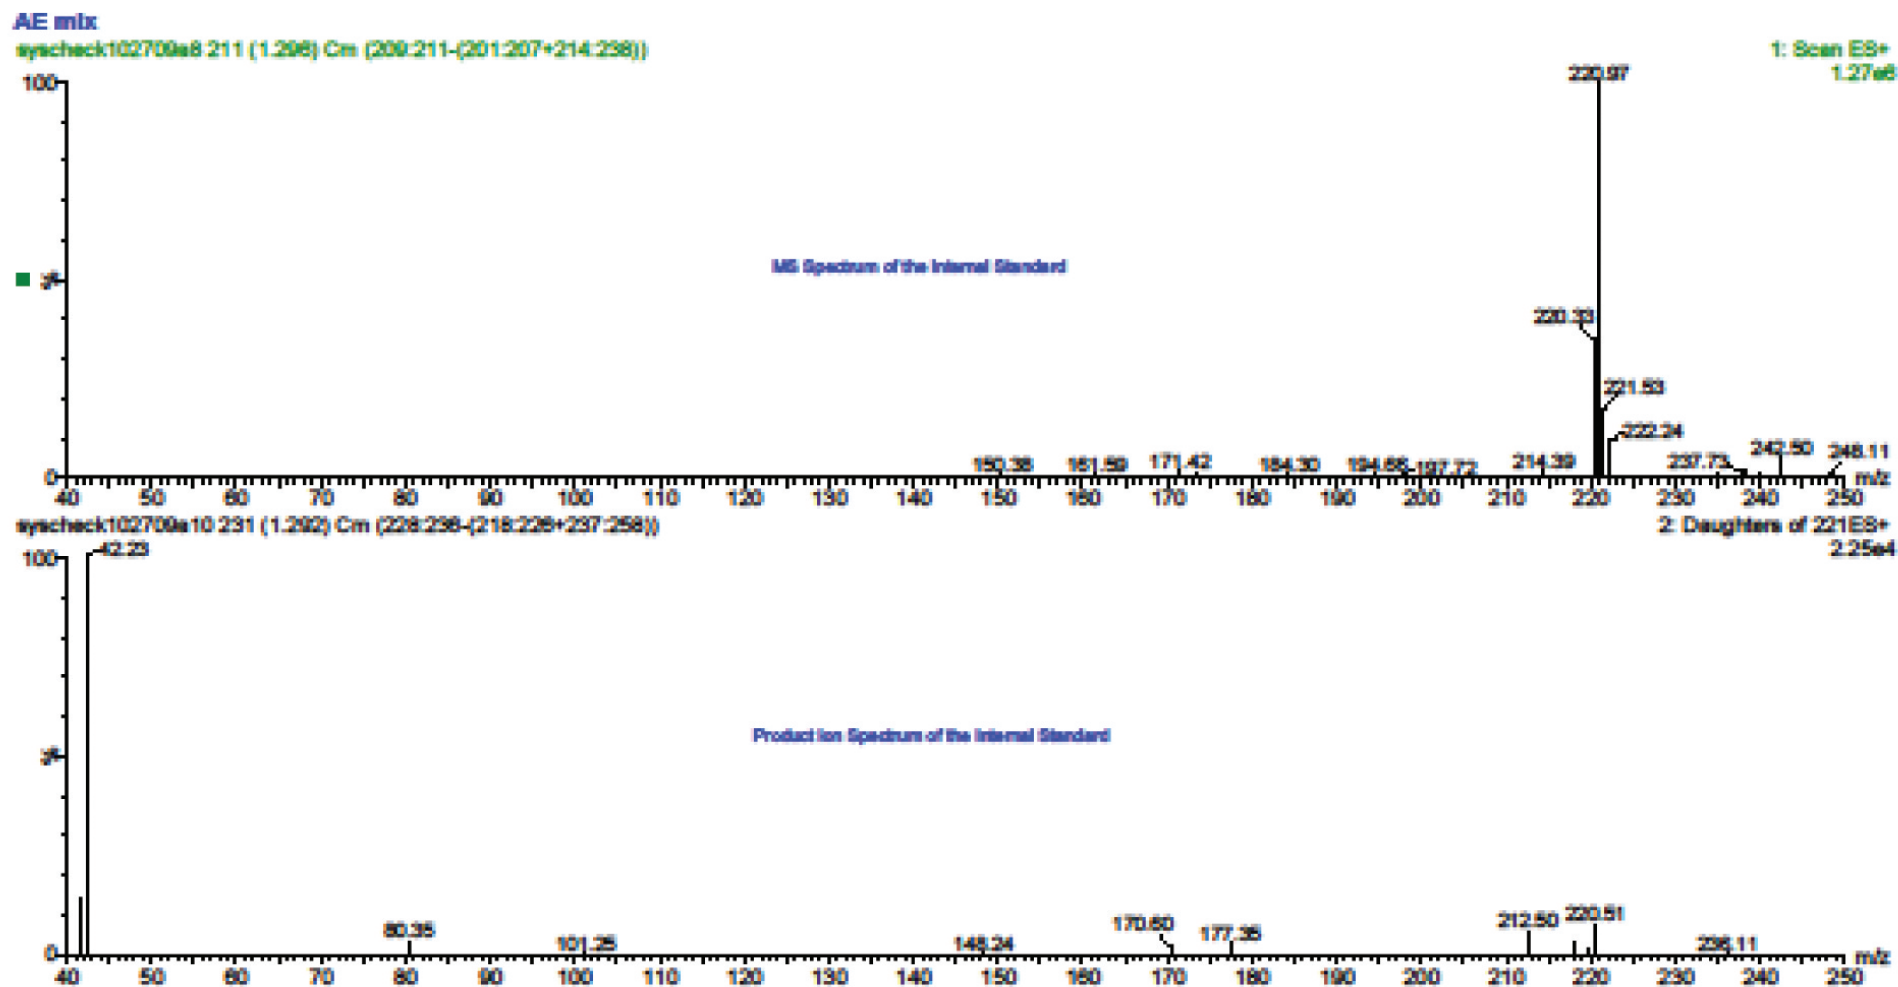

Supplemental Figure 8. MS and MSMS spectra for the internal standard (anthracene 2).
